# Supplementary material
Source: PubMed Central journal article supplement (PMC2640965)

Supplemental figure 1

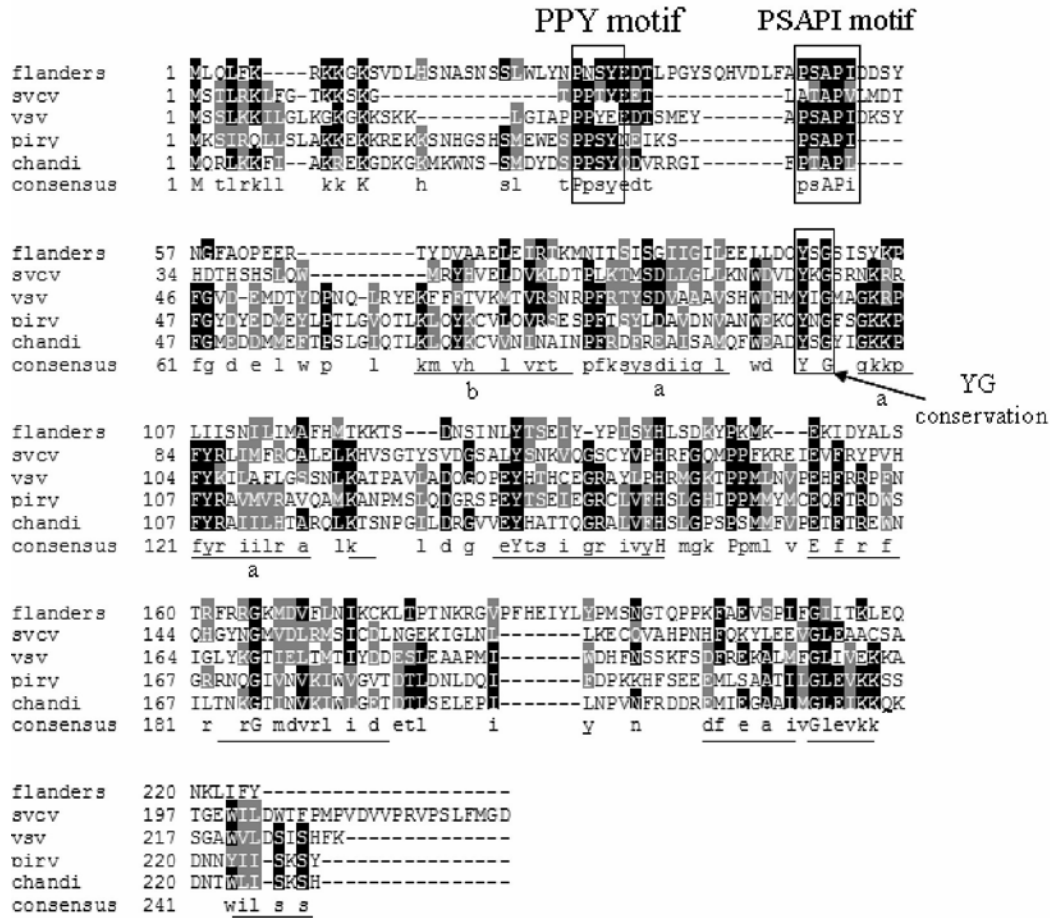

Supplement: M808136200_1.pdf [file M808136200_1.pdf]
